# Supplementary material
Source: PubMed Central journal article supplement (PMC3968490)
Supplement: ASN.2013030251_ASN2013030251SupplementaryData.pdf [file ASN.2013030251_ASN2013030251SupplementaryData.pdf]

**Supplementary Table 1, web appendix. Univariable and multivariable Cox analysis**

|                                                 | Relapse (n=15) |                 |              |
|-------------------------------------------------|----------------|-----------------|--------------|
|                                                 | Hazard ratio   | (95% CI)        | p-value      |
| <b>univariate</b>                               |                |                 |              |
| Male gender                                     | 0.629          | (0.223-1.772)   | 0.380        |
| Age (y) *                                       | 4.532          | (1.234-16.247)  | <b>0.020</b> |
| Adults age (>18y vs <=18y)                      | 0.480          | (0.173-1.329)   | 0.158        |
| Age at onset of nephropathy*                    | 1.029          | (1.007-1.052)   | <b>0.010</b> |
| Adults age at onset nephropathy (>18y vs <=18y) | 0.497          | (0.158-1.565)   | 0.232        |
| Median duration of relapses pre (years)*        | 0.206          | (0.010-4.229)   | 0.306        |
| Number of relapse pre rituximab*                | 0.003          | (0.00001-0.942) | <b>0.048</b> |
| Number of relapse pre rituximab (2 vs 1-2)      | 0.279          | (0.088-0.878)   | <b>0.029</b> |
| Systolic blood pressure (mmHg)                  | 0.980          | (0.938-1.024)   | 0.980        |
| Diastolic blood pressure (mmHg)                 | 0.972          | (0.923-1.024)   | 0.291        |
| MCD/MesGN vs FSGS                               | 1.555          | (0.436-5.539)   | 0.496        |
| Serum creatinine (mg/dl)*                       | 2.816          | (0.768-10.321)  | 0.118        |
| Serum albumin (g/dl)*                           | 0.996          | (0.976-1.017)   | 0.735        |
| Total Cholesterol (mg/dl)*                      | 0.979          | (0.934-1.026)   | 0.383        |
| Tryglicerides (mg/dl)*                          | 0.823          | (0.010-4.229)   | 0.122        |
| Number of immunosuppressive drugs (>1 vs 1)     | 1.736          | (0.617-4.88)    | 0.296        |
| <b>multivariate</b>                             |                |                 |              |
| Age at onset of nephropathy*                    | 1.025          | (1.002-1.048)   | 0.035        |
| Number of relapse pre rituximab (>2 vs 1-2)     | 0.330          | (0.102-1.065)   | 0.064        |
| Age at onset of nephropathy*                    | 1.025          | (1.001-1.049)   | 0.037        |
| Number of relapse pre rituximab*                | 0.004          | (0.00001-1.455) | 0.066        |

\* The powers chosen to model non linear continuous or ordinal baseline predictors by using first order fractional polynomial are -2 for age, -2 for age at onset nephropathy, 3 for median duration of relapses pre, -2 for number of relapse pre rituximab, 3 for serum creatinine, 3 for serum albumin, 3 for total cholesterol, 3 for triglycerides.

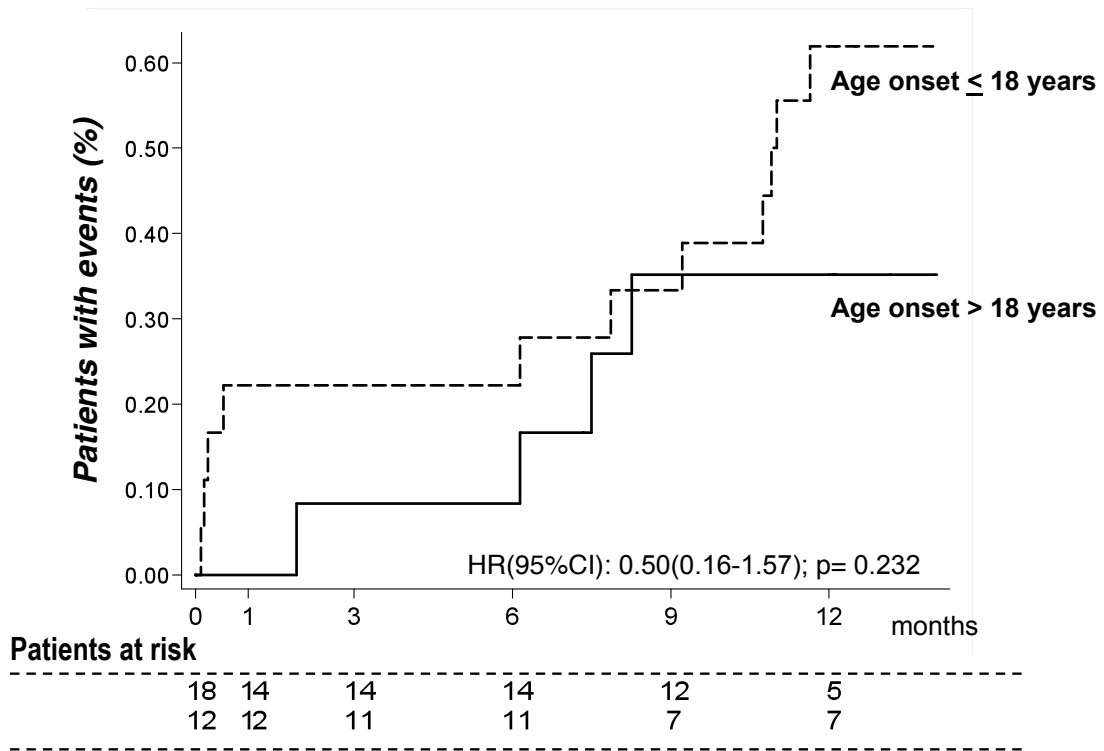

Extra Figure 1
